# Supplementary material
Source: PubMed Central journal article supplement (PMC1430341)

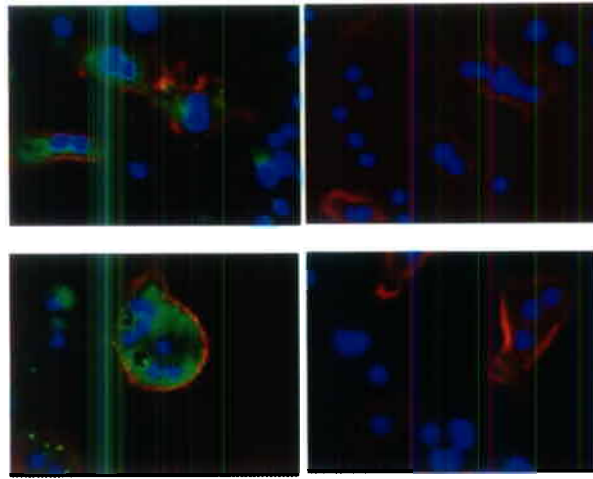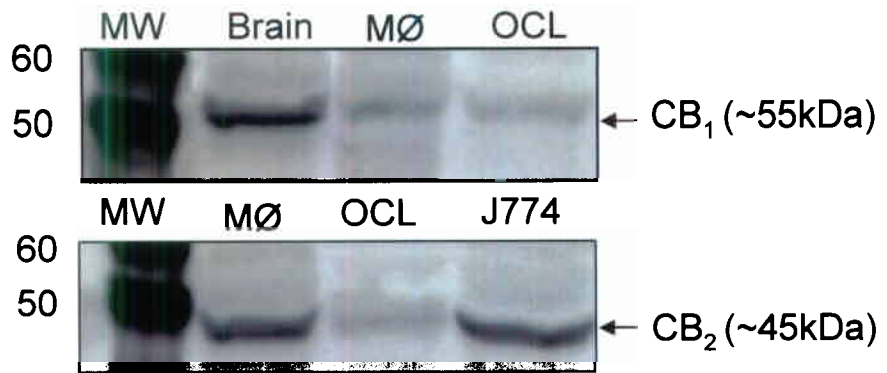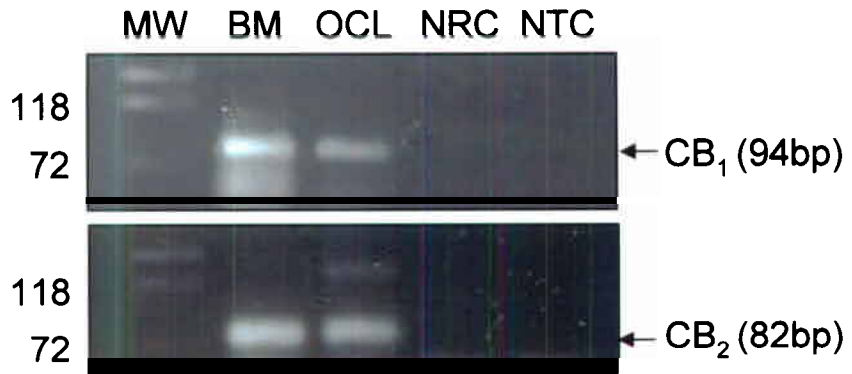

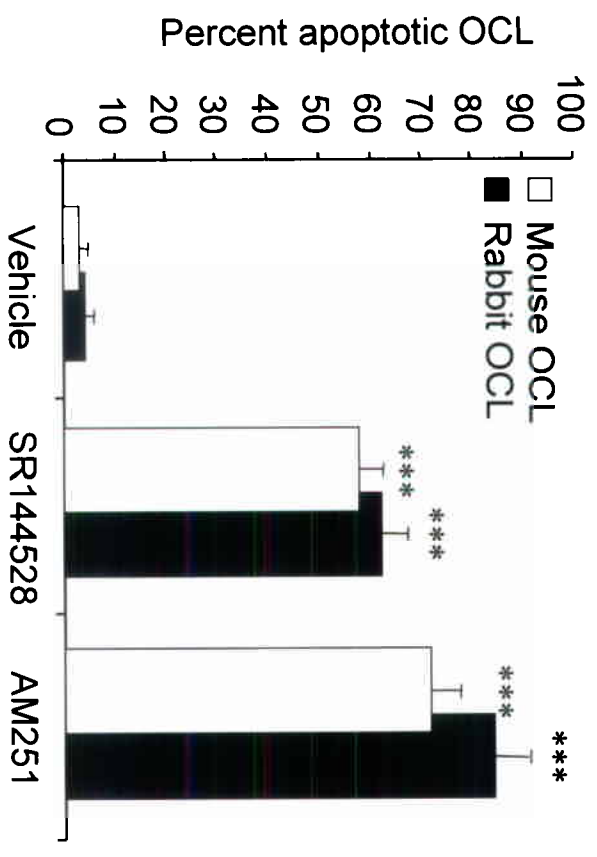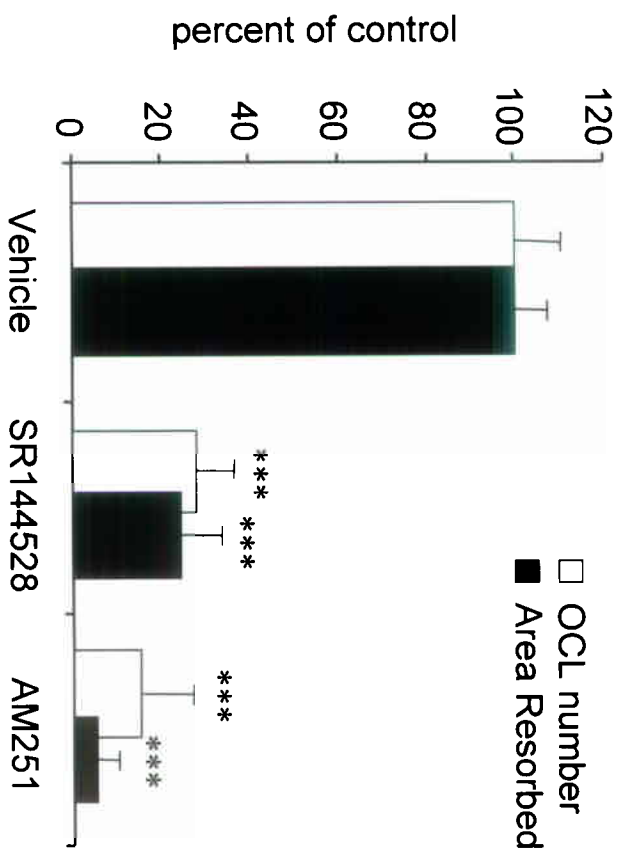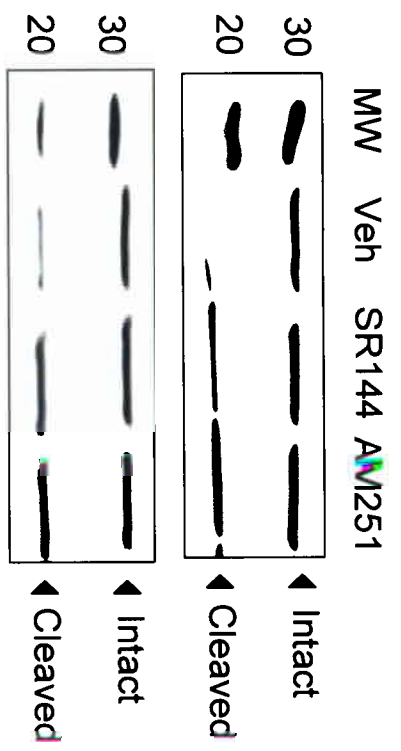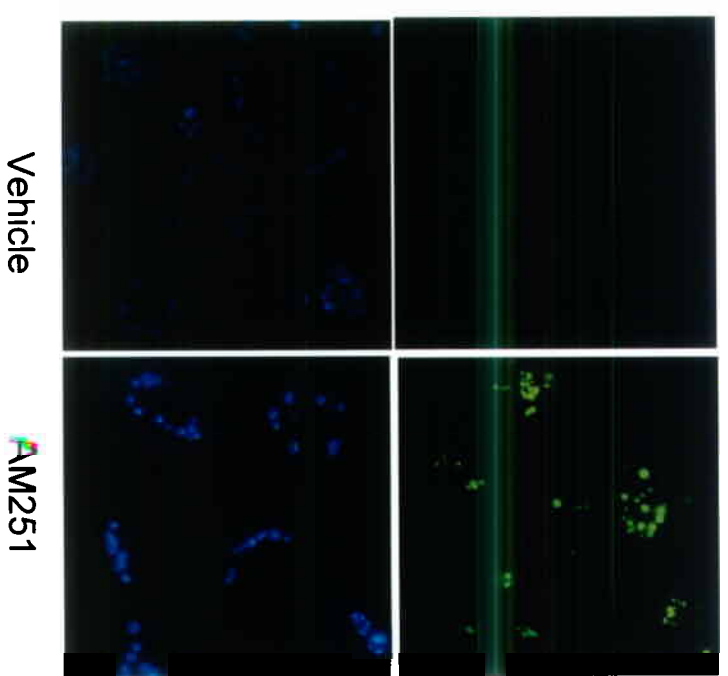

Supplement: NIHMS4880-supplement-sup2.pdf [file NIHMS4880-supplement-sup2.pdf]
